# Supplementary material
Source: PubMed Central journal article supplement (PMC9907516)
Supplement: ciac458_supplementary_data.pdf [file ciac458_supplementary_data.pdf]

**Supplementary Table 1. Antibody levels measured by ELISA, sVNT and PRNT against ancestral SARS-CoV-2 virus and the Omicron variant at Day 0 and 28 after third-dose BNT162b2 vaccination, in 20 randomly selected participants who previously received two doses of inactivated COVID-19 vaccine.** D0: Day 0 (baseline); D28: Day 28 (post-vaccination); ELISA: enzyme-linked immunosorbent assay; sVNT: surrogate virus neutralisation test; PRNT: plaque reduction neutralisation test; PRNT<sub>50</sub>: 50% plaque reduction neutralization titer; PRNT<sub>90</sub>: 90% plaque reduction neutralization titer; GMT: geometric mean titer.

|              | Ancestral SARS-CoV-2 virus               |            |                       |           |                          |            |                          |            | Omicron variant          |           |                          |           |
|--------------|------------------------------------------|------------|-----------------------|-----------|--------------------------|------------|--------------------------|------------|--------------------------|-----------|--------------------------|-----------|
|              | ELISA Spike RBD IgG (OD <sub>450</sub> ) |            | sVNT % inhibition (%) |           | PRNT <sub>50</sub> titer |            | PRNT <sub>90</sub> titer |            | PRNT <sub>50</sub> titer |           | PRNT <sub>90</sub> titer |           |
|              | D0                                       | D28        | D0                    | D28       | D0                       | D28        | D0                       | D28        | D0                       | D28       | D0                       | D28       |
| 1            | 0.2                                      | 1.7        | 20                    | 94        | <10                      | 160        | <10                      | 40         | <10                      | <10       | <10                      | <10       |
| 2            | 0.1                                      | 2.6        | 0                     | 97        | <10                      | ≥320       | <10                      | ≥320       | <10                      | 10        | <10                      | <10       |
| 3            | 1.2                                      | 1.9        | 6                     | 97        | <10                      | ≥320       | <10                      | 160        | <10                      | 20        | <10                      | 10        |
| 4            | 0.1                                      | 1.9        | 3                     | 97        | <10                      | ≥320       | <10                      | 160        | <10                      | 40        | <10                      | 10        |
| 5            | 0.2                                      | 1.9        | 14                    | 97        | <10                      | ≥320       | <10                      | 160        | <10                      | 80        | <10                      | 40        |
| 6            | 0.3                                      | 2.0        | 30                    | 97        | <10                      | ≥320       | <10                      | ≥320       | <10                      | 80        | <10                      | 20        |
| 7            | 0.1                                      | 1.8        | 0                     | 96        | 10                       | 160        | <10                      | 40         | <10                      | 20        | <10                      | 10        |
| 8            | 0.2                                      | 2.7        | 23                    | 97        | 10                       | ≥320       | <10                      | ≥320       | <10                      | 20        | <10                      | 10        |
| 9            | 0.7                                      | 1.5        | 42                    | 97        | 10                       | ≥320       | <10                      | ≥320       | <10                      | 40        | <10                      | 10        |
| 10           | 0.2                                      | 1.9        | 0                     | 97        | 10                       | ≥320       | <10                      | ≥320       | <10                      | 40        | <10                      | 10        |
| 11           | 0.5                                      | 1.7        | 48                    | 91        | 10                       | ≥320       | <10                      | ≥320       | <10                      | 160       | <10                      | 40        |
| 12           | 0.2                                      | 2.1        | 19                    | 98        | 10                       | ≥320       | <10                      | 80         | <10                      | ≥320      | <10                      | 160       |
| 13           | 0.2                                      | 1.8        | 23                    | 97        | 20                       | ≥320       | <10                      | 160        | <10                      | 20        | <10                      | <10       |
| 14           | 0.2                                      | 1.7        | 28                    | 97        | 20                       | ≥320       | <10                      | 160        | <10                      | 40        | <10                      | 10        |
| 15           | 0.2                                      | 1.9        | 6                     | 97        | 20                       | ≥320       | <10                      | ≥320       | <10                      | ≥320      | <10                      | 80        |
| 16           | 0.2                                      | 2.0        | 5                     | 97        | 20                       | ≥320       | <10                      | ≥320       | 10                       | 40        | <10                      | 20        |
| 17           | 0.4                                      | 1.7        | 37                    | 97        | 40                       | ≥320       | 10                       | ≥320       | <10                      | 80        | <10                      | 20        |
| 18           | 0.2                                      | 2.8        | 29                    | 97        | 40                       | ≥320       | 10                       | ≥320       | <10                      | 80        | <10                      | 20        |
| 19           | 0.7                                      | 2.0        | 44                    | 97        | 40                       | ≥320       | 10                       | ≥320       | <10                      | 160       | <10                      | 40        |
| 20           | 0.2                                      | 1.9        | 36                    | 97        | 40                       | ≥320       | 10                       | ≥320       | <10                      | ≥320      | <10                      | 160       |
| <b>Mean*</b> | <b>0.3</b>                               | <b>2.2</b> | <b>17</b>             | <b>96</b> | <b>12</b>                | <b>557</b> | <b>6</b>                 | <b>309</b> | <b>5</b>                 | <b>59</b> | <b>5</b>                 | <b>19</b> |

\*Note: For PRNT<sub>50</sub> or PRNT<sub>90</sub> mean titers, we estimated the geometric mean titer (i.e. GMT) by imputing titers <10 with the value 5 and titers ≥320 with the value 640.

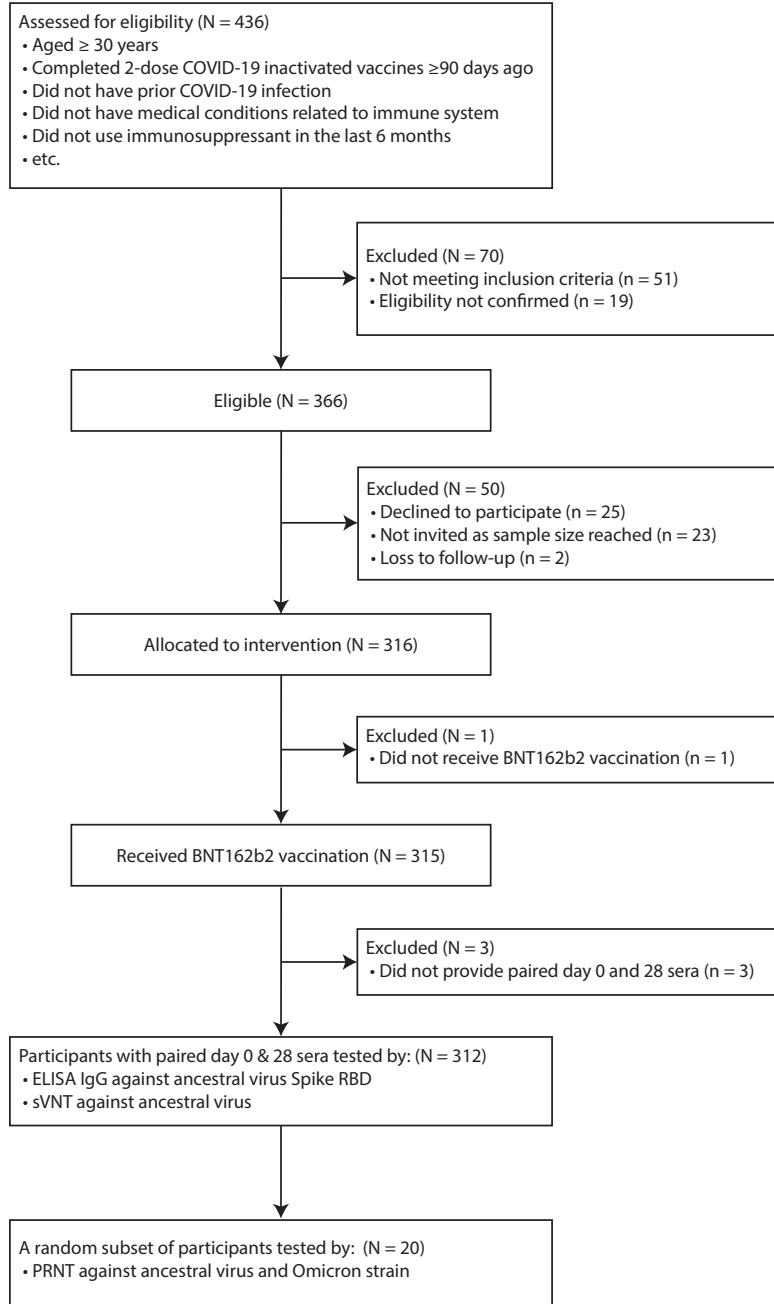

**Supplementary Figure 1. Flow chart for this single-arm, open-label clinical trial of BNT162b2 provided as a third vaccine dose in adults who previously received two doses of inactivated COVID-19 vaccine.**

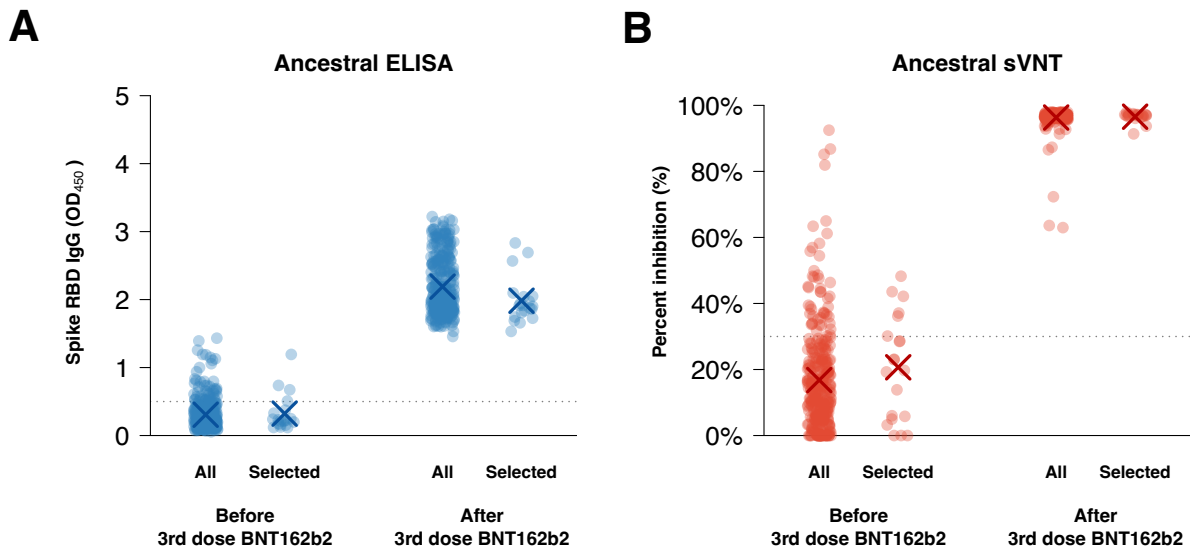

**Supplementary Figure 2. ELISA and sVNT antibody levels in 20 participants randomly selected to be tested by PRNT compared to all vaccinated participants with paired Day 0 and Day 28 sera collected. (A) ELISA for serum IgG against SARS-CoV-2 Spike receptor binding domain (RBD) of ancestral strain. (B) Surrogate virus neutralization test (sVNT) against ancestral strain. X indicates the mean level. All: all vaccinated participants with paired Day 0/Day 28 sera collected (N = 312); Selected: participants randomly selected to be tested by PRNT (N = 20).**

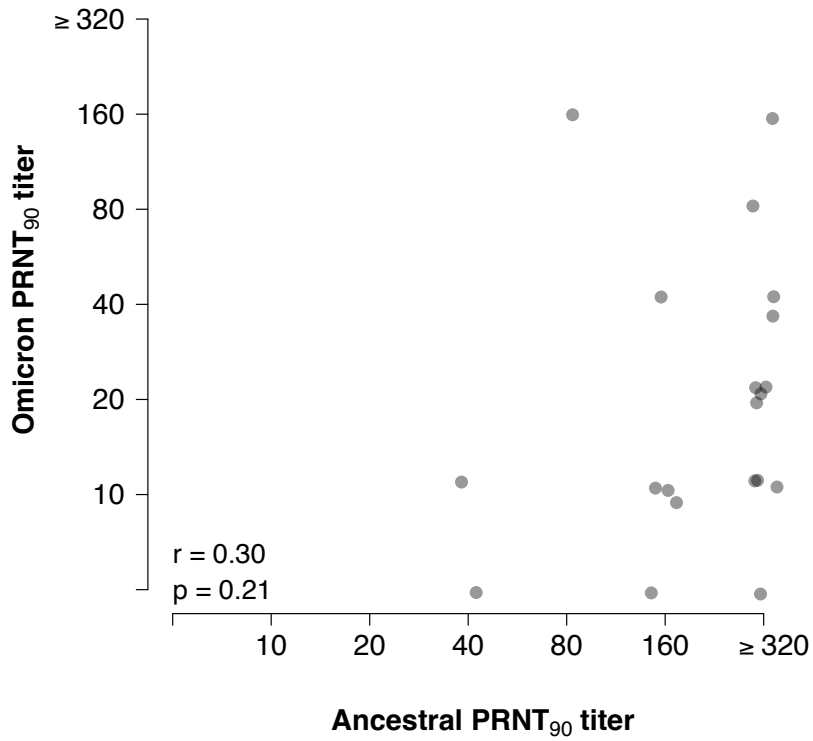

**Supplementary Figure 3. Correlation of PRNT<sub>90</sub> titers measured at Day 28 against ancestral strain and the Omicron variant in 20 participants randomly selected for performing PRNT.** PRNT titers are measured based on two-fold dilutions and plotted here within an interval, or <10 (plotted on axis) or ≥320 (plotted above 320). r: Spearman’s rank correlation coefficient; p: p-value.
